# Supplementary material for: Chromitite layers indicate the existence of large, long-lived, and entirely molten magma chambers
Source: Sci Rep. 2022 Mar 8;12:4092. doi: 10.1038/s41598-022-08110-6 (PMC8904791; doi:10.1038/s41598-022-08110-6)
Supplement: Supplementary file 2 — Supplementary Information 2. [file 41598_2022_8110_MOESM2_ESM.xlsx]

## Sheet: Fig.2f
X axis	Y axis
ESD (um) - BinCenter	Frequency (%Nb)
15	8.8063
45	12.7778
75	42.6644
105	23.3085
135	7.72605
165	2.74951
195	1.05461
225	0.447835
255	0.221179
285	0.120073
315	0.0637092
345	0.0340584
375	0.0148254
405	0.00721237
435	0.00200344
465	0.00160275
495	0.000400687
515	0

## Sheet: Fig. 3b
Coordination - UG1	Frequency (%Nb) - UG1	Coordination - MR	Frequency (%Nb) - MR	Coordination - Simulation	Frequency (%Nb) - Simulation
0	14.7565	0	1.6356	0	0
1	6.1802	1	3.02889	1	0
2	12.1989	2	7.66803	2	0.76038
3	15.3892	3	14.0513	3	39.5248
4	14.9468	4	17.7845	4	22.7164
5	12.1865	5	17.2901	5	14.3071
6	8.78359	6	13.3849	6	8.88945
7	5.89918	7	9.09936	7	4.98249
8	3.74242	8	5.84929	8	3.09655
9	2.32252	9	3.64453	9	1.75588
10	1.398	10	2.28646	10	1.13057
11	0.854532	11	1.39752	11	0.695348
12	0.524633	12	0.845273	12	0.48024
13	0.321885	13	0.624093	13	0.375188
14	0.19233	14	0.449403	14	0.270135
15	0.120206	15	0.302889	15	0.195098
16	0.0667812	16	0.190186	16	0.165083
17	0.0444763	17	0.109885	17	0.105053
18	0.0264453	18	0.101433	18	0.110055
19	0.0173631	19	0.0577603	19	0.0550275
20	0.00948293	20	0.0521252	20	0.0550275
21	0.00601031	21	0.0408549	21	0.04002
22	0.00414043	22	0.0295845	22	0.04002
23	0.00253768	23	0.0140879	23	0.0450225
24	0.00280481	24	0.0126791	24	0.02001
25	0.00120206	25	0.00845273	25	0.030015
26	0.000534249	26	0.00845273	26	0.030015
27	0.000267125	27	0.00281758	27	0.0150075
28	0.000133562	28	0.00422636	28	0.02001
29	0	29	0.00281758	29	0.010005
30	0.000133562	30	0.00563515	30	0.010005
31	0.000133562	31	0.00422636	31	0.0050025
32	0	32	0.00563515	32	0.010005
33	0.000133562	33	0.00422636	33	0.010005
34	0	34	0	34	0.0050025
35	0	35	0	35	0
36	0	36	0	36	0.0050025
37	0	37	0.00140879	37	0.0050025
38	0	38	0.00140879	38	0
39	0	39	0	39	0
40	0	40	0	40	0.0150075
41	0	41	0	41	0.0050025
42	0	42	0	42	0
43	0	43	0	43	0
44	0	44	0	44	0
45	0	45	0	45	0
46	0	46	0	46	0
47	0	47	0	47	0
48	0	48	0	48	0.0050025
49	0	49	0	49	0
50	0	50	0	50	0
51	0	51	0	51	0
52	0	52	0	52	0
53	0	53	0	53	0
54	0	54	0	54	0
55	0	55	0	55	0
56	0	56	0	56	0
57	0	57	0	57	0
58	0	58	0	58	0.0050025
59	0	59	0	59	0
60	0	60	0	60	0
61	0	61	0	61	0
62	0	62	0	62	0
63	0	63	0	63	0

## Sheet: Fig.3c
ESD (um) - BinCenter UG1	Mean coordination number_UG1	ESD (um) - BinCenter MR	Mean coordination number _MR	ESD (um) - BinCenter Simulation	Mean coordination number _Simulation
5	0	15	0	5	0
15	0.056026	45	0.354015	15	2.92714
25	0.216425	75	1.76688	25	3.05165
35	0.707292	105	2.96876	35	3.13668
45	1.47062	135	3.80839	45	3.22901
55	2.29422	165	4.5824	55	3.37559
65	2.99196	195	5.38478	65	3.63109
75	3.64576	225	6.21982	75	3.95895
85	4.18376	255	7.09504	85	4.30845
95	4.72364	285	7.98727	95	4.64547
105	5.26148	315	8.89579	105	5.16862
115	5.75541	345	9.76204	115	5.66845
125	6.1911	375	10.65	125	6.20774
135	6.59967	405	11.6462	135	7.01911
145	6.93755	435	11.8091	145	7.54894
155	7.23529	465	13.355	155	8.4492
165	7.55604	495	13.8983	165	9.25654
175	7.82583	525	14.85	175	9.95833
185	8.02939	555	15.7812	185	10.2162
195	8.09366	585	15.6486	195	11.7586
205	8.27496	615	17.8276	205	13.3951
215	8.24876	645	16.0909	215	14.6944
225	8.12879	675	15.6	225	15.4815
235	8.47079	705	18.7778	235	16.1379
245	8.24583	735	24.1667	245	18.3333
255	8.12094	765	21.2	255	19.6875
265	8.30474	795	23.3333	265	18.6316
275	8.23754	825	20	275	21
285	8.02273	845	22.8	285	22.3333
295	7.884			295	25.7273
305	8.16667			305	29.25
315	7.52601			315	24.6667
325	8.61864			325	26
335	8.46296			335	30.3333
345	8.06173			345	28
355	8.42424			355	39.3333
365	8.65455			375	32
375	8.22581			385	36.5
385	8.64			405	40
395	10.1071			415	50
405	6.08333
415	9.21429
425	8.96667
